# Supplementary material for: Genome-Wide Identification of Members of the Soybean CBL Gene Family and Characterization of the Functional Role of GmCBL1 in Responses to Saline and Alkaline Stress
Source: MDPI journal article supplement (doi:10.3390/plants13101304), 2024-05-09
Supplement: s1 [file s1]

Supplementary Material

Table S1 – Details of 103 identified CBL genes.

| Name           | Gene ID                | Gene location                | CDS (bp) | Protein length | PI   | MW (kDa) | Subcellular localization |
|----------------|------------------------|------------------------------|----------|----------------|------|----------|--------------------------|
| <i>AtCBL1</i>  | <i>AT1G64480</i>       | Chr1<br>23948027..23949751   | 645      | 215            | 4.76 | 24.65    | Mitochondrial            |
| <i>AtCBL2</i>  | <i>AT4G01420</i>       | Chr4<br>580037..581518       | 612      | 204            | 4.56 | 23.52    | Cytoplasmic              |
| <i>AtCBL3</i>  | <i>AT4G16350</i>       | Chr4<br>9242319..9243912     | 681      | 227            | 5.65 | 26.03    | Chloroplast              |
| <i>AtCBL4</i>  | <i>AT4G17615</i>       | Chr4<br>9816451..9819312     | 642      | 214            | 4.49 | 24.56    | Nuclear                  |
| <i>AtCBL5</i>  | <i>AT4G26560</i>       | Chr4<br>13406732..13407973   | 645      | 215            | 4.53 | 24.41    | Nuclear                  |
| <i>AtCBL6</i>  | <i>AT4G26570</i>       | Chr4<br>13408421..13411070   | 693      | 231            | 4.55 | 26.54    | Nuclear                  |
| <i>AtCBL7</i>  | <i>AT4G33000</i>       | Chr4<br>15924348..15926628   | 771      | 257            | 4.46 | 29.35    | Chloroplast              |
| <i>AtCBL8</i>  | <i>AT5G24270</i>       | Chr5<br>8238533..8243357     | 669      | 223            | 4.87 | 25.70    | Cytoplasmic              |
| <i>AtCBL9</i>  | <i>AT5G47100</i>       | Chr5<br>19129639..19132283   | 642      | 214            | 4.33 | 24.53    | Nuclear                  |
| <i>AtCBL10</i> | <i>AT5G55990</i>       | Chr5<br>22671451..22673855   | 681      | 227            | 4.66 | 25.81    | Extracellular matrix     |
| <i>ZmCBL1</i>  | <i>Zm00001eb023890</i> | Chr1<br>96334208..96338781   | 642      | 214            | 4.50 | 24.47    | Cytoplasmic              |
| <i>ZmCBL2</i>  | <i>Zm00001eb030890</i> | Chr1<br>171126747..171139985 | 678      | 226            | 4.55 | 25.79    | Cytoplasmic              |
| <i>ZmCBL3</i>  | <i>Zm00001eb051150</i> | Chr1<br>260095851..260114275 | 762      | 254            | 4.82 | 29.19    | Cytoplasmic              |
| <i>ZmCBL4</i>  | <i>Zm00001eb135370</i> | Chr3<br>116785120..116812850 | 678      | 226            | 4.60 | 25.92    | Cytoplasmic              |
| <i>ZmCBL5</i>  | <i>Zm00001eb160330</i> | Chr3<br>226083928..226087845 | 963      | 321            | 5.14 | 35.58    | Chloroplast              |
| <i>ZmCBL6</i>  | <i>Zm00001eb161280</i> | Chr3<br>228698970..228702491 | 657      | 219            | 4.60 | 25.06    | Cytoplasmic              |
| <i>ZmCBL7</i>  | <i>Zm00001eb203330</i> | Chr4<br>227516915..227519211 | 669      | 223            | 4.54 | 25.47    | Cytoplasmic              |
| <i>ZmCBL8</i>  | <i>Zm00001eb293130</i> | Chr6<br>170736802..170739618 | 672      | 224            | 4.51 | 25.24    | Chloroplast              |
| <i>ZmCBL9</i>  | <i>Zm00001eb390900</i> | Chr9<br>119599874..119604943 | 642      | 214            | 4.39 | 24.46    | Nuclear                  |
| <i>OsCBL1</i>  | <i>LOC_Os01g39770</i>  | Chr1<br>22427830..22430870   | 873      | 291            | 4.58 | 32.90    | Chloroplast              |
| <i>OsCBL2</i>  | <i>LOC_Os01g41510</i>  | Chr1<br>23498442..23502377   | 657      | 219            | 4.54 | 25.09    | Mitochondrial            |
| <i>OsCBL3</i>  | <i>LOC_Os01g51420</i>  | Chr1<br>29568546..29571484   | 801      | 267            | 4.61 | 29.92    | Chromoplast              |
| <i>OsCBL4</i>  | <i>LOC_Os02g18880</i>  | Chr2<br>11015827..11017808   | 642      | 214            | 4.52 | 24.40    | Chloroplast              |
| <i>OsCBL5</i>  | <i>LOC_Os02g18930</i>  | Chr2<br>11057895..11059975   | 642      | 214            | 4.66 | 24.49    | Chloroplast              |
| <i>OsCBL6</i>  | <i>LOC_Os03g42840</i>  | Chr3<br>23888728..23895481   | 678      | 226            | 4.51 | 25.81    | Cytoplasmic              |

|                |                                           |                             |     |     |      |       |                          |
|----------------|-------------------------------------------|-----------------------------|-----|-----|------|-------|--------------------------|
| <i>OsCBL7</i>  | <i>LOC_Os05g45810</i>                     | Chr5<br>26535877..26537911  | 633 | 211 | 4.72 | 23.92 | Chloroplast              |
| <i>OsCBL8</i>  | <i>LOC_Os10g41510</i>                     | Chr10<br>22298889..22308687 | 642 | 214 | 4.40 | 24.50 | Chloroplast              |
| <i>OsCBL9</i>  | <i>LOC_Os12g06510</i>                     | Chr12<br>3145027..3149567   | 885 | 295 | 4.79 | 33.48 | Cytoplasmic              |
| <i>OsCBL10</i> | <i>LOC_Os12g40510</i>                     | Chr12<br>25063166..25068213 | 678 | 226 | 4.55 | 25.87 | Cytoplasmic              |
| <i>GsCBL1</i>  | <i>GlysoPI483463.04</i><br><i>G192800</i> | Chr4<br>50657900..50664524  | 672 | 224 | 4.44 | 25.26 | Cytoplasmic              |
| <i>GsCBL2</i>  | <i>GlysoPI483463.05</i><br><i>G060000</i> | Chr5<br>6754784..6764523    | 642 | 214 | 4.49 | 24.42 | Nuclear                  |
| <i>GsCBL3</i>  | <i>GlysoPI483463.06</i><br><i>G117200</i> | Chr6<br>10809099..10816038  | 672 | 224 | 4.46 | 25.44 | Cytoplasmic              |
| <i>GsCBL4</i>  | <i>GlysoPI483463.07</i><br><i>G009700</i> | Chr7<br>827952..830976      | 792 | 264 | 4.76 | 30.43 | Cytoplasmic              |
| <i>GsCBL5</i>  | <i>GlysoPI483463.07</i><br><i>G226300</i> | Chr7<br>44427530..44435578  | 681 | 227 | 4.39 | 25.78 | Extracellular<br>matrix  |
| <i>GsCBL6</i>  | <i>GlysoPI483463.08</i><br><i>G021700</i> | Chr8<br>1919783..1922344    | 708 | 236 | 4.58 | 26.73 | Nuclear                  |
| <i>GsCBL7</i>  | <i>GlysoPI483463.08</i><br><i>G178200</i> | Chr8<br>15960299..15963649  | 786 | 262 | 4.64 | 30.12 | Cytoplasmic              |
| <i>GsCBL8</i>  | <i>GlysoPI483463.08</i><br><i>G292900</i> | Chr8<br>45360406..45364803  | 681 | 227 | 4.45 | 26.04 | Cytoplasmic              |
| <i>GsCBL9</i>  | <i>GlysoPI483463.09</i><br><i>G014800</i> | Chr9<br>1280304..1284347    | 681 | 227 | 4.64 | 25.93 | Nuclear                  |
| <i>GsCBL10</i> | <i>GlysoPI483463.11</i><br><i>G035000</i> | Chr11<br>2819080..2821207   | 639 | 213 | 4.31 | 24.40 | Nuclear                  |
| <i>GsCBL11</i> | <i>GlysoPI483463.17</i><br><i>G004000</i> | Chr17<br>1635199..1640348   | 681 | 227 | 4.40 | 25.80 | Chloroplast              |
| <i>GsCBL12</i> | <i>GlysoPI483463.17</i><br><i>G136100</i> | Chr17<br>12486387..12490657 | 819 | 273 | 4.95 | 31.49 | Chloroplast              |
| <i>GsCBL13</i> | <i>GlysoPI483463.17</i><br><i>G195000</i> | Chr17<br>5711081..5719023   | 777 | 259 | 4.44 | 29.26 | Chloroplast              |
| <i>GsCBL14</i> | <i>GlysoPI483463.18</i><br><i>G067300</i> | Chr18<br>7128650..7133441   | 681 | 227 | 7.23 | 26.07 | Cytoplasmic              |
| <i>VuCBL1</i>  | <i>Vigun02g160400</i>                     | Chr2<br>30635046..30638732  | 639 | 213 | 4.65 | 24.44 | Cytoplasmic              |
| <i>VuCBL2</i>  | <i>Vigun03g035200</i>                     | Chr3<br>2707112..2710410    | 663 | 221 | 4.53 | 25.24 | Chloroplast              |
| <i>VuCBL3</i>  | <i>Vigun03g297200</i>                     | Chr3<br>48352954..48357092  | 642 | 214 | 4.57 | 24.48 | Nuclear                  |
| <i>VuCBL4</i>  | <i>Vigun03g437100</i>                     | Chr3<br>64073888..64080875  | 681 | 227 | 4.50 | 25.84 | Chloroplast              |
| <i>VuCBL5</i>  | <i>Vigun06g066300</i>                     | Chr6<br>19457635..19462125  | 681 | 227 | 4.45 | 26.04 | Cytoplasmic              |
| <i>VuCBL6</i>  | <i>Vigun06g148100</i>                     | Chr6<br>27292665..27298292  | 684 | 228 | 4.62 | 26.16 | Chloroplast              |
| <i>VuCBL7</i>  | <i>Vigun09g149400</i>                     | Chr9<br>31299345..31304400  | 897 | 229 | 5.04 | 34.62 | Nuclear                  |
| <i>VuCBL8</i>  | <i>Vigun10g174100</i>                     | Chr10<br>39276850..392801   | 777 | 259 | 4.53 | 29.45 | Cytoplasmic              |
| 56             |                                           |                             |     |     |      |       |                          |
| <i>SbCBL1</i>  | <i>Sobic.001G294300</i>                   | Chr1<br>57270694..57274360  | 642 | 214 | 4.50 | 24.49 | Cytoplasmic              |
| <i>SbCBL2</i>  | <i>Sobic.003G196400</i>                   | Chr3<br>52152819..52157258  | 960 | 320 | 4.93 | 35.87 | Endoplasmic<br>reticulum |
| <i>SbCBL3</i>  | <i>Sobic.003G208400</i>                   | Chr3<br>53959654..53964864  | 657 | 219 | 4.68 | 25.11 | Mitochondrial            |
| <i>SbCBL4</i>  | <i>Sobic.003G275000</i>                   | Chr3<br>61123590..61127013  | 852 | 284 | 5.14 | 32.29 | Chloroplast              |
| <i>SbCBL5</i>  | <i>Sobic.004G130600</i>                   | Chr4<br>16905084..16908896  | 642 | 214 | 4.45 | 24.39 | Cytoplasmic              |

|                |                                 |                             |     |     |      |       |               |
|----------------|---------------------------------|-----------------------------|-----|-----|------|-------|---------------|
| <i>SbCBL6</i>  | <i>Sobic.008G046500</i>         | Chr8<br>4578265..4582802    | 672 | 224 | 4.68 | 25.68 | Chloroplast   |
| <i>SbCBL7</i>  | <i>Sobic.008G152800</i>         | Chr8<br>58517447..58523171  | 678 | 226 | 4.61 | 25.85 | Nuclear       |
| <i>SbCBL8</i>  | <i>Sobic.009G210300</i>         | Chr9<br>55662844..55665067  | 639 | 213 | 4.39 | 24.05 | Chloroplast   |
| <i>PvCBL1</i>  | <i>Phvul.001G034600</i>         | Chr1<br>3265192..3270335    | 810 | 270 | 4.51 | 30.13 | Cytoplasmic   |
| <i>PvCBL2</i>  | <i>Phvul.002G002300</i>         | Chr2<br>192377..193630      | 429 | 143 | 4.43 | 20.55 | Cytoplasmic   |
| <i>PvCBL3</i>  | <i>Phvul.002G299300</i>         | Chr2<br>46727451..46730153  | 762 | 242 | 4.62 | 27.65 | Nuclear       |
| <i>PvCBL4</i>  | <i>Phvul.002G299400</i>         | Chr2<br>46731777..46733742  | 645 | 215 | 4.74 | 24.54 | Mitochondrial |
| <i>PvCBL5</i>  | <i>Phvul.003G088500</i>         | Chr3<br>17036118..17042866  | 681 | 227 | 4.50 | 25.85 | Chloroplast   |
| <i>PvCBL6</i>  | <i>Phvul.003G225900</i>         | Chr3<br>45718718..45722898  | 642 | 214 | 4.57 | 24.54 | Mitochondrial |
| <i>PvCBL7</i>  | <i>Phvul.006G059266</i>         | Chr6<br>16722421..16726237  | 681 | 227 | 4.45 | 26.08 | Cytoplasmic   |
| <i>PvCBL8</i>  | <i>Phvul.006G135900</i>         | Chr6<br>24357014..24361952  | 684 | 228 | 4.88 | 26.10 | Cytoplasmic   |
| <i>PvCBL9</i>  | <i>Phvul.009G052700</i>         | Chr9<br>10154081..10158087  | 672 | 224 | 4.47 | 25.67 | Cytoplasmic   |
| <i>PvCBL10</i> | <i>Phvul.010G139700</i>         | Chr10<br>42201713..42205147 | 795 | 265 | 4.63 | 30.16 | Cytoplasmic   |
| <i>TaCBL1</i>  | <i>Traes_1AL_021B94<br/>DEB</i> | Chr1A<br>0..4771            | 588 | 196 | 4.45 | 22.32 | Cytoplasmic   |
| <i>TaCBL2</i>  | <i>Traes_1AL_4AB2B<br/>F02A</i> | Chr1A<br>2683..7530         | 648 | 216 | 4.57 | 24.67 | Cytoplasmic   |
| <i>TaCBL3</i>  | <i>Traes_1AL_746797<br/>AE4</i> | Chr1A<br>5628..8192         | 642 | 214 | 4.59 | 24.52 | Mitochondrial |
| <i>TaCBL4</i>  | <i>Traes_1BL_3BF7C<br/>2841</i> | Chr1B<br>22236..24893       | 675 | 225 | 4.66 | 25.78 | Mitochondrial |
| <i>TaCBL5</i>  | <i>Traes_1BL_AE5EA<br/>0313</i> | Chr1B<br>1506..3179         | 612 | 204 | 4.40 | 23.05 | Mitochondrial |
| <i>TaCBL6</i>  | <i>Traes_1BL_DA652<br/>B828</i> | Chr1B<br>2..3639            | 615 | 205 | 4.41 | 23.28 | Mitochondrial |
| <i>TaCBL7</i>  | <i>Traes_1DL_2154C<br/>A1B7</i> | Chr1D<br>2464..5776         | 642 | 214 | 4.59 | 24.49 | Chloroplast   |
| <i>TaCBL8</i>  | <i>Traes_1DL_5F63C<br/>A08I</i> | Chr1D<br>1034..2868         | 621 | 207 | 4.41 | 23.55 | Mitochondrial |
| <i>TaCBL9</i>  | <i>Traes_1DL_69F530<br/>041</i> | Chr1D<br>7..1666            | 249 | 83  | 4.02 | 9.39  | Cytoplasmic   |
| <i>TaCBL10</i> | <i>Traes_1DL_771752<br/>3DF</i> | Chr1D<br>75..2114           | 582 | 194 | 4.69 | 22.32 | Mitochondrial |
| <i>TaCBL11</i> | <i>Traes_1DL_E3D49<br/>237I</i> | Chr1D<br>3173..4974         | 258 | 86  | 3.86 | 9.51  | Nuclear       |
| <i>TaCBL12</i> | <i>Traes_3AL_8456B7<br/>FB8</i> | Chr3A<br>1840..5048         | 918 | 306 | 5.03 | 34.80 | Cytoplasmic   |
| <i>TaCBL13</i> | <i>Traes_3DL_42B337<br/>576</i> | Chr3D<br>0..1263            | 246 | 82  | 4.07 | 9.43  | Cytoplasmic   |
| <i>TaCBL14</i> | <i>Traes_4AL_212D76<br/>6F6</i> | Chr4A<br>3612..7099         | 309 | 103 | 4.91 | 11.92 | Nuclear       |
| <i>TaCBL15</i> | <i>Traes_4BS_EBA462<br/>C3F</i> | Chr4B<br>3651..8333         | 783 | 261 | 5.80 | 29.51 | Chloroplast   |
| <i>TaCBL16</i> | <i>Traes_4DL_FBF95<br/>B5AF</i> | Chr4D<br>582..4852          | 651 | 217 | 4.58 | 24.60 | Cytoplasmic   |
| <i>TaCBL17</i> | <i>Traes_4DS_C7F4F<br/>974B</i> | Chr4D<br>2634..7773         | 678 | 226 | 4.57 | 25.73 | Cytoplasmic   |
| <i>TaCBL18</i> | <i>Traes_5AL_F2D4A<br/>CCA3</i> | Chr5A<br>408..4091          | 585 | 195 | 4.30 | 22.24 | Extracellular |
| <i>TaCBL19</i> | <i>Traes_5BS_F12838<br/>5EB</i> | Chr5B<br>0..5084            | 678 | 226 | 4.62 | 25.89 | Cytoplasmic   |

Table S2 – Collinear gene pairs of CBLs in eight species.

| Number | Gene 1         | Gene 2         |
|--------|----------------|----------------|
| 1      | <i>GmCBL2</i>  | <i>ZmCBL1</i>  |
| 2      | <i>GmCBL2</i>  | <i>ZmCBL9</i>  |
| 3      | <i>GmCBL5</i>  | <i>ZmCBL5</i>  |
| 4      | <i>GmCBL8</i>  | <i>ZmCBL5</i>  |
| 5      | <i>GmCBL11</i> | <i>ZmCBL1</i>  |
| 6      | <i>GmCBL11</i> | <i>ZmCBL9</i>  |
| 7      | <i>GmCBL13</i> | <i>ZmCBL1</i>  |
| 8      | <i>GmCBL13</i> | <i>ZmCBL9</i>  |
| 9      | <i>GmCBL1</i>  | <i>OsCBL4</i>  |
| 10     | <i>GmCBL2</i>  | <i>OsCBL8</i>  |
| 11     | <i>GmCBL4</i>  | <i>OsCBL4</i>  |
| 12     | <i>GmCBL5</i>  | <i>OsCBL3</i>  |
| 13     | <i>GmCBL8</i>  | <i>OsCBL3</i>  |
| 14     | <i>GmCBL11</i> | <i>OsCBL8</i>  |
| 15     | <i>GmCBL13</i> | <i>OsCBL8</i>  |
| 16     | <i>GmCBL1</i>  | <i>PvCBL3</i>  |
| 17     | <i>GmCBL1</i>  | <i>PvCBL9</i>  |
| 18     | <i>GmCBL2</i>  | <i>PvCBL2</i>  |
| 19     | <i>GmCBL2</i>  | <i>PvCBL6</i>  |
| 20     | <i>GmCBL3</i>  | <i>PvCBL3</i>  |
| 21     | <i>GmCBL4</i>  | <i>PvCBL3</i>  |
| 22     | <i>GmCBL4</i>  | <i>PvCBL9</i>  |
| 23     | <i>GmCBL5</i>  | <i>PvCBL1</i>  |
| 24     | <i>GmCBL5</i>  | <i>PvCBL10</i> |
| 25     | <i>GmCBL6</i>  | <i>PvCBL5</i>  |
| 26     | <i>GmCBL6</i>  | <i>PvCBL8</i>  |
| 27     | <i>GmCBL7</i>  | <i>PvCBL3</i>  |
| 28     | <i>GmCBL8</i>  | <i>PvCBL10</i> |
| 29     | <i>GmCBL9</i>  | <i>PvCBL7</i>  |
| 30     | <i>GmCBL9</i>  | <i>PvCBL8</i>  |
| 31     | <i>GmCBL10</i> | <i>PvCBL5</i>  |
| 32     | <i>GmCBL10</i> | <i>PvCBL7</i>  |
| 33     | <i>GmCBL10</i> | <i>PvCBL8</i>  |
| 34     | <i>GmCBL11</i> | <i>PvCBL2</i>  |
| 35     | <i>GmCBL11</i> | <i>PvCBL6</i>  |
| 36     | <i>GmCBL12</i> | <i>PvCBL5</i>  |
| 37     | <i>GmCBL12</i> | <i>PvCBL8</i>  |
| 38     | <i>GmCBL12</i> | <i>PvCBL7</i>  |
| 39     | <i>GmCBL13</i> | <i>PvCBL2</i>  |
| 40     | <i>GmCBL13</i> | <i>PvCBL6</i>  |
| 41     | <i>GmCBL14</i> | <i>PvCBL1</i>  |
| 42     | <i>GmCBL15</i> | <i>PvCBL8</i>  |

|    |                |                |
|----|----------------|----------------|
| 43 | <i>GmCBL15</i> | <i>PvCBL7</i>  |
| 44 | <i>GmCBL1</i>  | <i>SbCBL5</i>  |
| 45 | <i>GmCBL2</i>  | <i>SbCBL1</i>  |
| 46 | <i>GmCBL13</i> | <i>SbCBL1</i>  |
| 47 | <i>GmCBL4</i>  | <i>SbCBL5</i>  |
| 48 | <i>GmCBL5</i>  | <i>SbCBL4</i>  |
| 49 | <i>GmCBL5</i>  | <i>SbCBL2</i>  |
| 50 | <i>GmCBL8</i>  | <i>SbCBL4</i>  |
| 51 | <i>GmCBL8</i>  | <i>SbCBL2</i>  |
| 52 | <i>GmCBL11</i> | <i>SbCBL1</i>  |
| 53 | <i>GmCBL1</i>  | <i>GsCBL1</i>  |
| 54 | <i>GmCBL1</i>  | <i>GsCBL3</i>  |
| 55 | <i>GmCBL2</i>  | <i>GsCBL2</i>  |
| 56 | <i>GmCBL2</i>  | <i>GsCBL10</i> |
| 57 | <i>GmCBL2</i>  | <i>GsCBL12</i> |
| 58 | <i>GmCBL3</i>  | <i>GsCBL1</i>  |
| 59 | <i>GmCBL3</i>  | <i>GsCBL3</i>  |
| 60 | <i>GmCBL3</i>  | <i>GsCBL6</i>  |
| 61 | <i>GmCBL4</i>  | <i>GsCBL1</i>  |
| 62 | <i>GmCBL4</i>  | <i>GsCBL3</i>  |
| 63 | <i>GmCBL5</i>  | <i>GsCBL4</i>  |
| 64 | <i>GmCBL5</i>  | <i>GsCBL7</i>  |
| 65 | <i>GmCBL5</i>  | <i>GsCBL13</i> |
| 66 | <i>GmCBL6</i>  | <i>GsCBL5</i>  |
| 67 | <i>GmCBL6</i>  | <i>GsCBL9</i>  |
| 68 | <i>GmCBL6</i>  | <i>GsCBL11</i> |
| 69 | <i>GmCBL7</i>  | <i>GsCBL1</i>  |
| 70 | <i>GmCBL7</i>  | <i>GsCBL3</i>  |
| 71 | <i>GmCBL7</i>  | <i>GsCBL6</i>  |
| 72 | <i>GmCBL8</i>  | <i>GsCBL4</i>  |
| 73 | <i>GmCBL8</i>  | <i>GsCBL7</i>  |
| 74 | <i>GmCBL9</i>  | <i>GsCBL8</i>  |
| 75 | <i>GmCBL9</i>  | <i>GsCBL9</i>  |
| 76 | <i>GmCBL9</i>  | <i>GsCBL14</i> |
| 77 | <i>GmCBL10</i> | <i>GsCBL5</i>  |
| 78 | <i>GmCBL10</i> | <i>GsCBL8</i>  |
| 79 | <i>GmCBL10</i> | <i>GsCBL9</i>  |
| 80 | <i>GmCBL10</i> | <i>GsCBL11</i> |
| 81 | <i>GmCBL10</i> | <i>GsCBL14</i> |
| 82 | <i>GmCBL11</i> | <i>GsCBL2</i>  |
| 83 | <i>GmCBL11</i> | <i>GsCBL10</i> |
| 84 | <i>GmCBL11</i> | <i>GsCBL12</i> |
| 85 | <i>GmCBL12</i> | <i>GsCBL5</i>  |
| 86 | <i>GmCBL12</i> | <i>GsCBL8</i>  |

|     |                |                |
|-----|----------------|----------------|
| 87  | <i>GmCBL12</i> | <i>GsCBL9</i>  |
| 88  | <i>GmCBL12</i> | <i>GsCBL11</i> |
| 89  | <i>GmCBL12</i> | <i>GsCBL14</i> |
| 90  | <i>GmCBL13</i> | <i>GsCBL2</i>  |
| 91  | <i>GmCBL13</i> | <i>GsCBL10</i> |
| 92  | <i>GmCBL13</i> | <i>GsCBL12</i> |
| 93  | <i>GmCBL14</i> | <i>GsCBL13</i> |
| 94  | <i>GmCBL15</i> | <i>GsCBL8</i>  |
| 95  | <i>GmCBL15</i> | <i>GsCBL9</i>  |
| 96  | <i>GmCBL15</i> | <i>GsCBL14</i> |
| 97  | <i>GmCBL1</i>  | <i>AtCBL8</i>  |
| 98  | <i>GmCBL2</i>  | <i>AtCBL9</i>  |
| 99  | <i>GmCBL3</i>  | <i>AtCBL1</i>  |
| 100 | <i>GmCBL4</i>  | <i>AtCBL8</i>  |
| 101 | <i>GmCBL6</i>  | <i>AtCBL3</i>  |
| 102 | <i>GmCBL7</i>  | <i>AtCBL1</i>  |
| 103 | <i>GmCBL9</i>  | <i>AtCBL5</i>  |
| 104 | <i>GmCBL9</i>  | <i>AtCBL10</i> |
| 105 | <i>GmCBL10</i> | <i>AtCBL3</i>  |
| 106 | <i>GmCBL10</i> | <i>AtCBL10</i> |
| 107 | <i>GmCBL11</i> | <i>AtCBL9</i>  |
| 108 | <i>GmCBL11</i> | <i>AtCBL4</i>  |
| 109 | <i>GmCBL12</i> | <i>AtCBL3</i>  |
| 110 | <i>GmCBL13</i> | <i>AtCBL9</i>  |
| 111 | <i>GmCBL13</i> | <i>AtCBL4</i>  |
| 112 | <i>GmCBL14</i> | <i>AtCBL7</i>  |
| 113 | <i>GmCBL15</i> | <i>AtCBL5</i>  |
| 114 | <i>GmCBL15</i> | <i>AtCBL10</i> |
| 115 | <i>GmCBL1</i>  | <i>VuCBL2</i>  |
| 116 | <i>GmCBL1</i>  | <i>VuCBL7</i>  |
| 117 | <i>GmCBL2</i>  | <i>VuCBL1</i>  |
| 118 | <i>GmCBL2</i>  | <i>VuCBL3</i>  |
| 119 | <i>GmCBL3</i>  | <i>VuCBL2</i>  |
| 120 | <i>GmCBL3</i>  | <i>VuCBL7</i>  |
| 121 | <i>GmCBL4</i>  | <i>VuCBL2</i>  |
| 122 | <i>GmCBL4</i>  | <i>VuCBL7</i>  |
| 123 | <i>GmCBL5</i>  | <i>VuCBL8</i>  |
| 124 | <i>GmCBL6</i>  | <i>VuCBL4</i>  |
| 125 | <i>GmCBL6</i>  | <i>VuCBL5</i>  |
| 126 | <i>GmCBL6</i>  | <i>VuCBL6</i>  |
| 127 | <i>GmCBL7</i>  | <i>VuCBL2</i>  |
| 128 | <i>GmCBL7</i>  | <i>VuCBL7</i>  |
| 129 | <i>GmCBL8</i>  | <i>VuCBL8</i>  |
| 130 | <i>GmCBL9</i>  | <i>VuCBL4</i>  |

|     |                |                |
|-----|----------------|----------------|
| 131 | <i>GmCBL9</i>  | <i>VuCBL5</i>  |
| 132 | <i>GmCBL9</i>  | <i>VuCBL6</i>  |
| 133 | <i>GmCBL10</i> | <i>VuCBL4</i>  |
| 134 | <i>GmCBL10</i> | <i>VuCBL5</i>  |
| 135 | <i>GmCBL10</i> | <i>VuCBL6</i>  |
| 136 | <i>GmCBL11</i> | <i>VuCBL1</i>  |
| 137 | <i>GmCBL11</i> | <i>VuCBL3</i>  |
| 138 | <i>GmCBL12</i> | <i>VuCBL4</i>  |
| 139 | <i>GmCBL12</i> | <i>VuCBL6</i>  |
| 140 | <i>GmCBL12</i> | <i>VuCBL5</i>  |
| 141 | <i>GmCBL13</i> | <i>VuCBL1</i>  |
| 142 | <i>GmCBL13</i> | <i>VuCBL3</i>  |
| 143 | <i>GmCBL15</i> | <i>VuCBL4</i>  |
| 144 | <i>GmCBL15</i> | <i>VuCBL6</i>  |
| 145 | <i>GmCBL15</i> | <i>VuCBL5</i>  |
| 146 | <i>GmCBL1</i>  | <i>GmCBL4</i>  |
| 147 | <i>GmCBL2</i>  | <i>GmCBL11</i> |
| 148 | <i>GmCBL2</i>  | <i>GmCBL13</i> |
| 149 | <i>GmCBL3</i>  | <i>GmCBL7</i>  |
| 150 | <i>GmCBL5</i>  | <i>GmCBL8</i>  |
| 151 | <i>GmCBL6</i>  | <i>GmCBL10</i> |
| 152 | <i>GmCBL6</i>  | <i>GmCBL12</i> |
| 153 | <i>GmCBL9</i>  | <i>GmCBL10</i> |
| 154 | <i>GmCBL9</i>  | <i>GmCBL15</i> |
| 155 | <i>GmCBL10</i> | <i>GmCBL12</i> |
| 156 | <i>GmCBL10</i> | <i>GmCBL15</i> |
| 157 | <i>GmCBL11</i> | <i>GmCBL12</i> |
| 158 | <i>GmCBL12</i> | <i>GmCBL15</i> |

---

Table S3 – Primers used in this study.

| Primer names | Sequence (5' – 3')                                  | Description  |
|--------------|-----------------------------------------------------|--------------|
| GmCBL1-F     | attgattagagatcttctagaATGGGCTGCTACTGCTCAACTT         | Gene cloning |
| GmCBL1-R     | gcccttgctcaccatgagctcCATCTCTGACTCTTCAATATCTGTTCTTAT | Gene cloning |
| GmACTIN4-qF  | GTGTCAGCCATACTGTCCCCATTT                            | qRT-PCR      |
| GmACTIN4-qR  | GTTTCAAGCTCTTGCTCGTAATCA                            | qRT-PCR      |
| GmCBL1-qF    | ATGGGCTGCTACTGCTCAA                                 | qRT-PCR      |
| GmCBL1-qR    | AATGACCCCATTCGCTTGA                                 | qRT-PCR      |
| GmCBL2-qF    | AAGTCAGCGAGGCAGTTTCC                                | qRT-PCR      |
| GmCBL2-qR    | CGTCATCGACAACAGAACTGC                               | qRT-PCR      |
| GmCBL3-qF    | ACCAAACAGCGAGTCGATCA                                | qRT-PCR      |
| GmCBL3-qR    | TAACCCCGTCGTGGATGATG                                | qRT-PCR      |
| GmCBL4-qF    | TCCAGCTGGCACTATTCAGG                                | qRT-PCR      |
| GmCBL4-qR    | CCCAAACCTCAATGACCCCGT                               | qRT-PCR      |
| GmCBL5-qF    | GCTGTGCTCGGTGTTTCATTC                               | qRT-PCR      |
| GmCBL5-qR    | GGCGAGGGTGAGAATGTCAT                                | qRT-PCR      |
| GmCBL6-qF    | TCTTGCAAGAGAGACCGTGT                                | qRT-PCR      |
| GmCBL6-qR    | AAGACAGAGAGAGCACGTGC                                | qRT-PCR      |
| GmCBL7-qF    | GCGCCACAAACACAAAAAGC                                | qRT-PCR      |
| GmCBL7-qR    | TCCGTCTCCTTTTGAGTCTGC                               | qRT-PCR      |
| GmCBL8-qF    | CTGTGCGCAGTGTTTCATTC                                | qRT-PCR      |
| GmCBL8-qR    | TTGAACAACCTACGCAAGGC                                | qRT-PCR      |
| GmCBL9-qF    | AGCACTCTACGAGCTCTTCA                                | qRT-PCR      |
| GmCBL9-qR    | GGAAAACGGAGAGAGCACGA                                | qRT-PCR      |
| GmCBL10-qF   | TGTCTTTCATCCCAGCGCAT                                | qRT-PCR      |
| GmCBL10-qR   | TTCAGCTAGAGTGGCAACCA                                | qRT-PCR      |
| GmCBL11-qF   | GAGCATCAGTAGGTCCGTCG                                | qRT-PCR      |
| GmCBL11-qR   | AGCGCTCTAACGAAGTCACC                                | qRT-PCR      |
| GmCBL12-qF   | TTGCACGAGCTCTCTGTGC                                 | qRT-PCR      |
| GmCBL12-qR   | TTCAGAAGGGATGGATGCCG                                | qRT-PCR      |
| GmCBL13-qF   | ATGGGCTGCATGAACTCGAA                                | qRT-PCR      |
| GmCBL13-qR   | TCCTTGCTTAGCAGTCCATCA                               | qRT-PCR      |
| GmCBL14-qF   | GTTCCACCATAGCCACGGAT                                | qRT-PCR      |
| GmCBL14-qR   | TCAAAACCTCAACCACCGCT                                | qRT-PCR      |
| GmCBL15-qF   | ATGTTGCGGTGCTTAGAGGG                                | qRT-PCR      |
| GmCBL15-qR   | TCGTCGATTACAGCACTGCT                                | qRT-PCR      |
| GmCPA1-qF    | GGGATTGCTTGTAGGCACCT                                | qRT-PCR      |
| GmCPA1-qR    | CCCAGCCGATGATGAGTACC                                | qRT-PCR      |
| GmAPX1-qF    | AGAAAGGGCTTCTTCGCTCC                                | qRT-PCR      |
| GmAPX1-qR    | GATTTTGCGAAGTCCTGGCG                                | qRT-PCR      |
| GmCAT1-qF    | GCGCTAGTGCAAAGGGTTTC                                | qRT-PCR      |
| GmCAT1-qR    | AAGGTTTCAGGGCTACCACG                                | qRT-PCR      |
| GmGSH1-qF    | TGAGGAACAGGCCGTACAAC                                | qRT-PCR      |
| GmGSH1-qR    | AAAAACCCGGTCTGGAAGCC                                | qRT-PCR      |



| Primer names | Sequence (5' – 3')   | Description |
|--------------|----------------------|-------------|
| GmSOD1-qF    | AGGAAGGGCTGTTGTTGTCC | qRT-PCR     |
| GmSOD1-qR    | CACAAGCTACTCTGCCACCA | qRT-PCR     |

Table S4 – Motif sequences identified by MEME tool.

| Motif    | Best possible match                                | Number of amino acids |
|----------|----------------------------------------------------|-----------------------|
| Motif 1  | RNGVIEFEEFVRALSVFHPNAPJEDKIEFSFRLYDLKQTGFIERZEVKZM | 50                    |
| Motif 2  | IIDKTFEEADTKHDGKIDKEEWKNFVLRHPSLL                  | 33                    |
| Motif 3  | EIEALYELFKKJSSSIIDDGLISKEEFQLALFKTKKKENLFADRVFDLFD | 50                    |
| Motif 4  | NMTLPYLKDITTTFSPFVHFS                              | 21                    |
| Motif 5  | MVQCLDGLKPLFAAIINCCDADIYKQPRGLEBPVLAARETV          | 41                    |
| Motif 6  | ALLAESGMNLSDDVI                                    | 15                    |
| Motif 7  | MGCYCSKSRKTEPDP                                    | 15                    |
| Motif 8  | RLSLRSSLTFGETLCAVFIPLIGIVEALVFTFTSCFDFQSP          | 41                    |
| Motif 9  | LASETPFTVN                                         | 10                    |
| Motif 10 | HWHFNGNH                                           | 8                     |

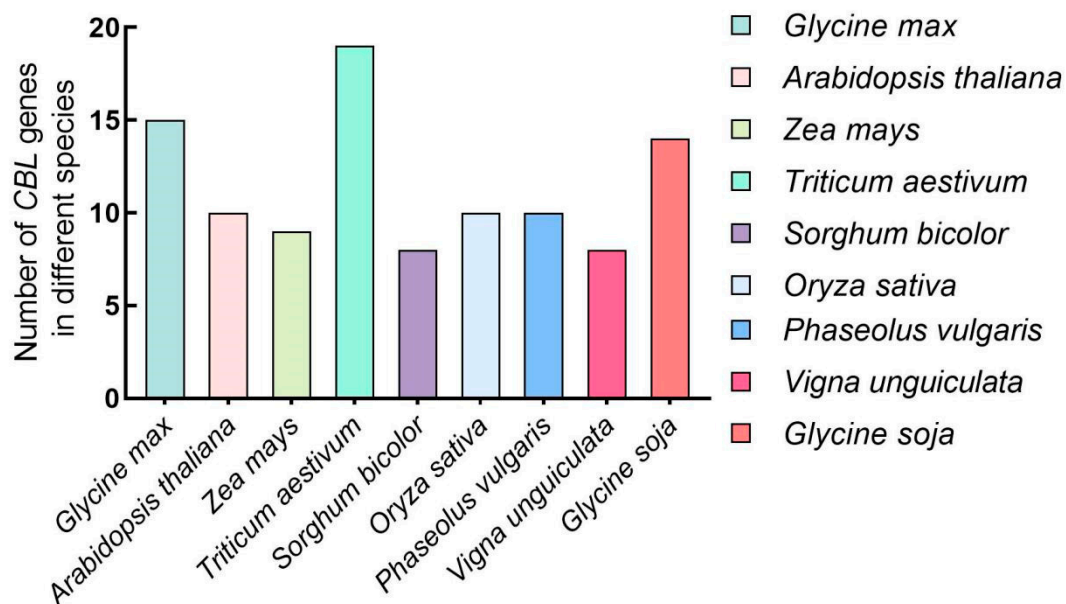

Figure. S1 – Numbers of CBL genes in nine plant species.



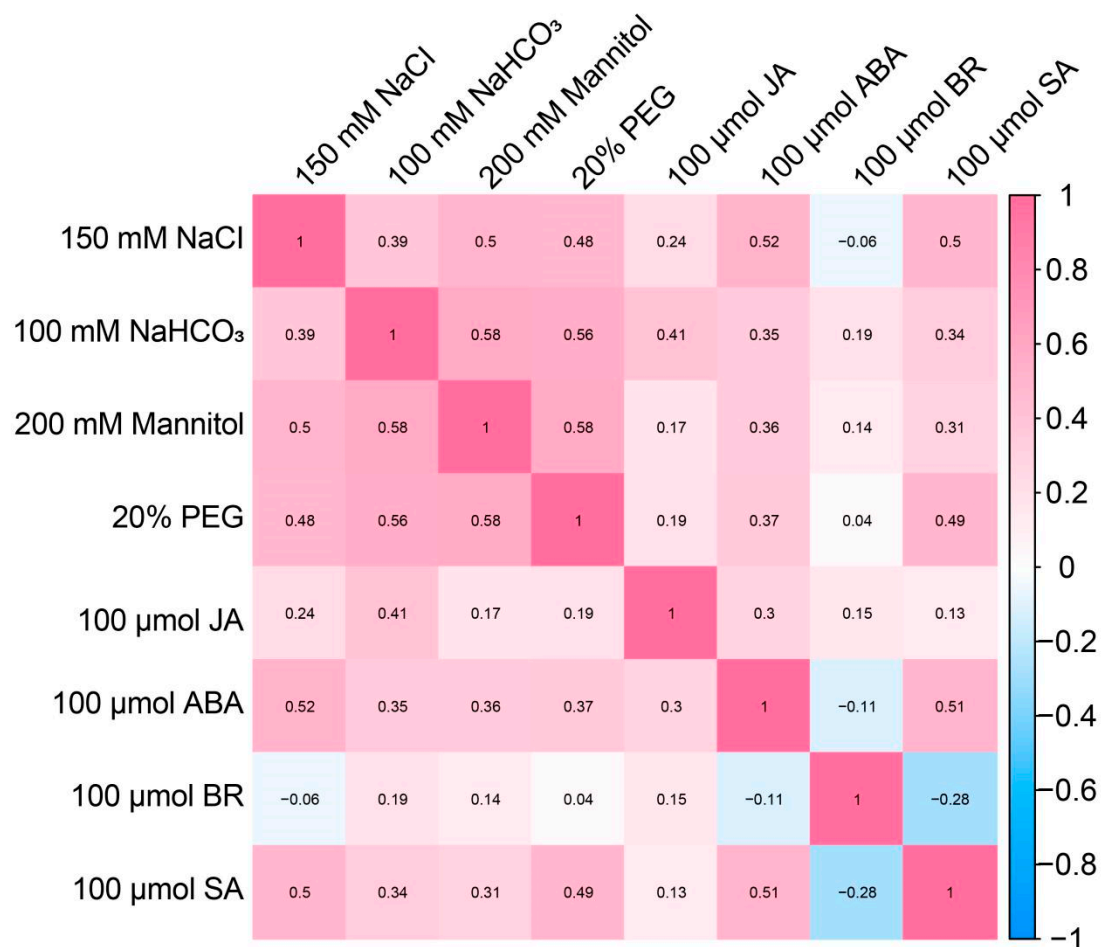

Figure. S4 – Correlation analysis of hormone stress and abiotic stress. Positive numbers represent positive correlation and negative numbers represent negative correlation. The color scale, ranging from -1.00 to 1.00 with blue representing lower values and pink representing higher values, is used to depict the normalized gene expression correlation.

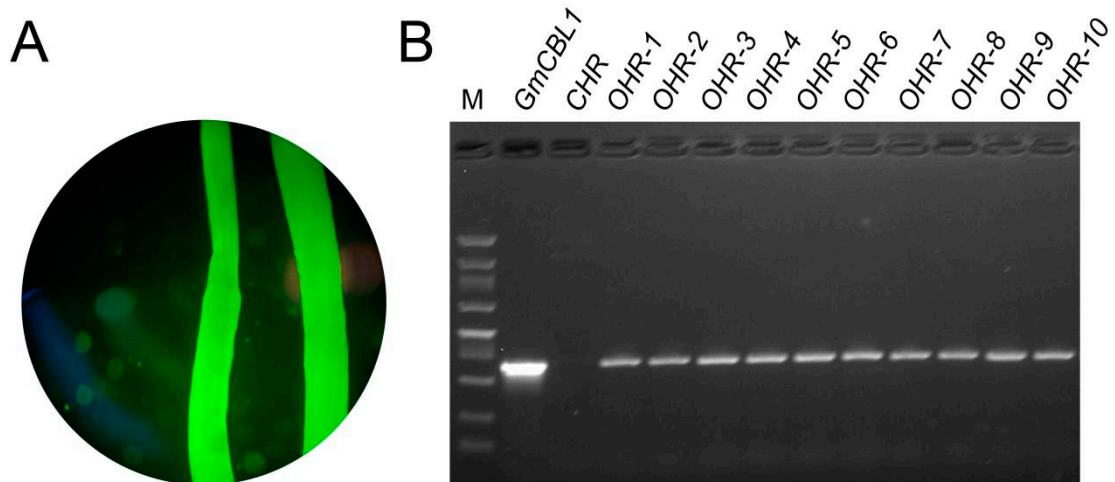

Figure. S5 – Identification of *GmCBL1* transgenic soybean hair roots.

(A) Images were captured approximately 3 weeks post-transformation to assess GFP fluorescence using a Leica stereomicroscope. (B) PCR verification of *GmCBL1* in the *35s::GmCBL1*-overexpressing hairy roots (OHR1-10). M: DNA marker; Vector: the plasmid of empty vector (*pSOY I-GFP*), as the negative control; *GmCBL1*: the recombinant expression plasmid of *pSOY I-GmCBL1::GFP*, as the positive control. M: 2K PLUS.
